# Supplementary material for: Ultraviolet-induced in situ gold nanoparticles for point-of-care testing of infectious diseases in loop-mediated isothermal amplification
Source: Royal Society of Chemistry journal article supplement (doi:10.1039/d1lc00019e), 2021-01-01
Supplement: d1lc00019e1.pdf [file d1lc00019e1.pdf]

## Ultraviolet-induced *in situ* gold nanoparticles for point-of-care testing of infectious diseases in loop-mediated isothermal amplification

Rajamanickam Sivakumar,<sup>a</sup> Vu Phong Dinh<sup>b</sup> and Nae Yoon Lee<sup>\*b</sup>

<sup>a</sup> Department of Industrial and Environmental Engineering, College of Industrial Environmental Engineering, Gachon University, 1342 Seongnam-daero, Sujeong-gu, Seongnam-si, Gyeonggi-do, 13120, Korea

<sup>b</sup> Department of BioNano Technology, Gachon University, 1342 Seongnam-daero, Sujeong-gu, Seongnam-si, Gyeonggi-do, 13120, Korea

E-mail: [nylee@gachon.ac.kr](mailto:nylee@gachon.ac.kr) (Prof. N.Y.Lee)

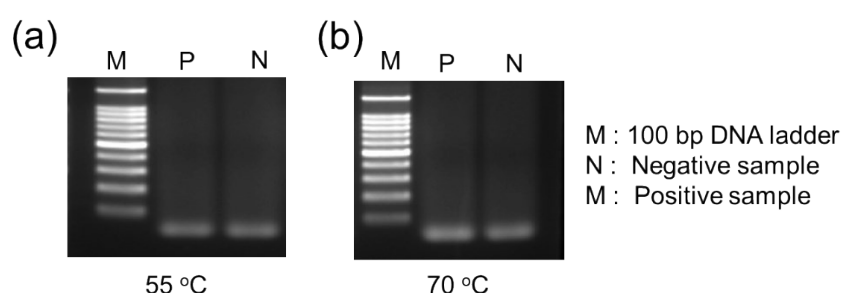

**Fig. S1** Results of agarose gel electrophoresis for LAMP amplification performed at (a) 55 °C and (b) 70 °C.

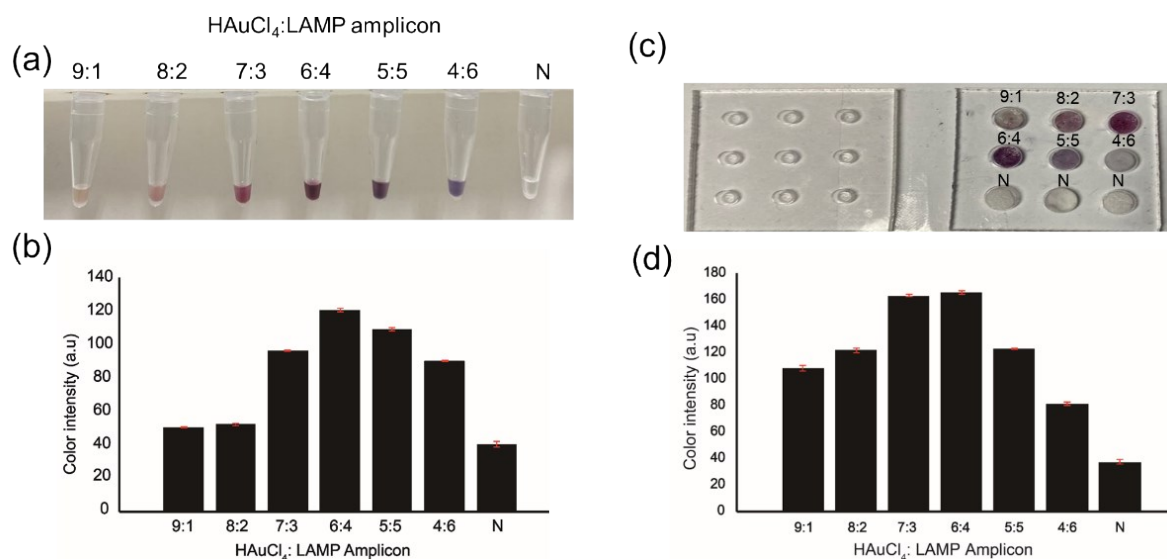

**Fig. S2** Results of colorimetric detection showing the various volumes of HAuCl<sub>4</sub> on the displayed color when mixed with LAMP amplicons examined in the microtubes (a and b) and paper-based portable device (c and d).

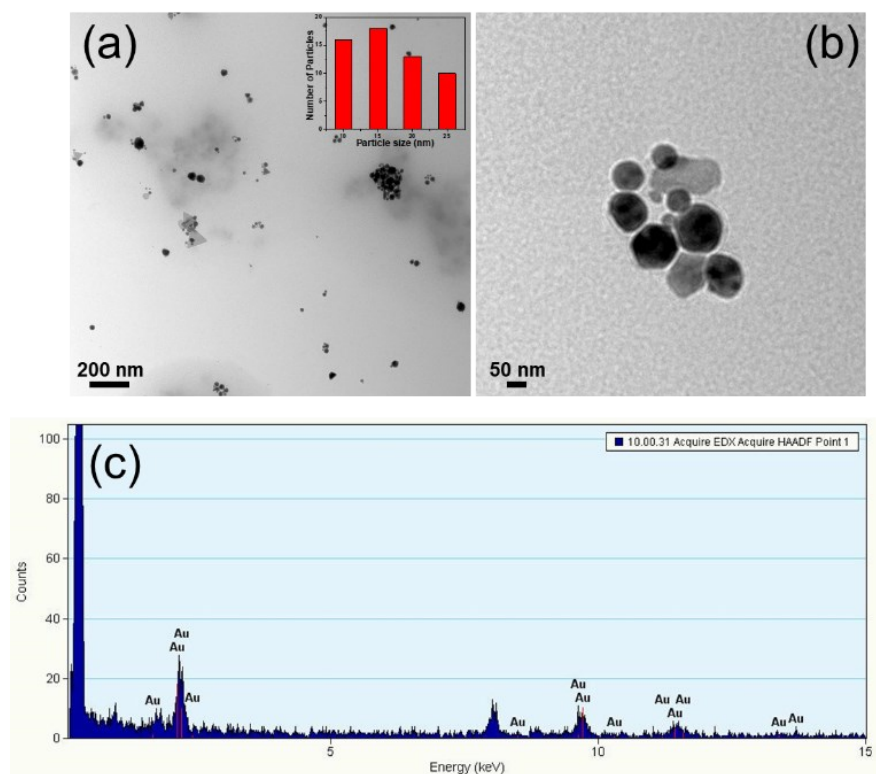

**Fig. S3** (a, b) TEM images of AuNPs and (c) TEM-EDX image of AuNPs.

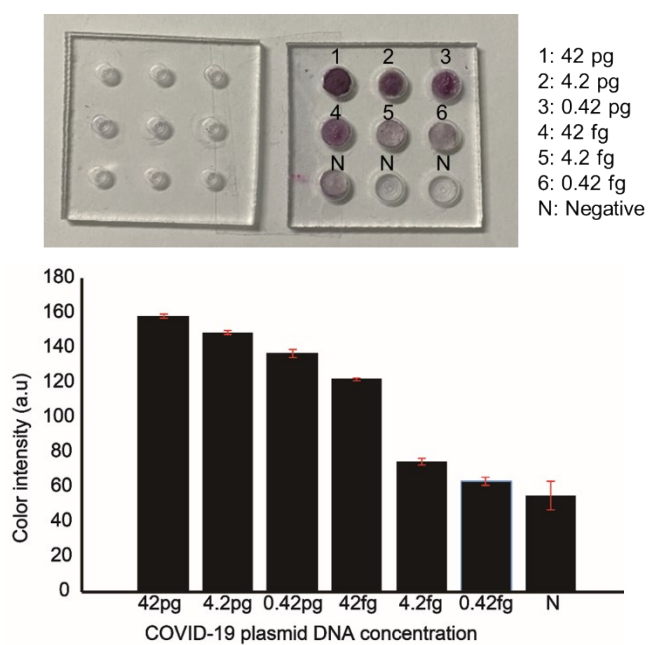

**Fig. S4** Results of 10-fold serial dilution of COVID-19 plasmid DNA observed using a paper-based portable device.

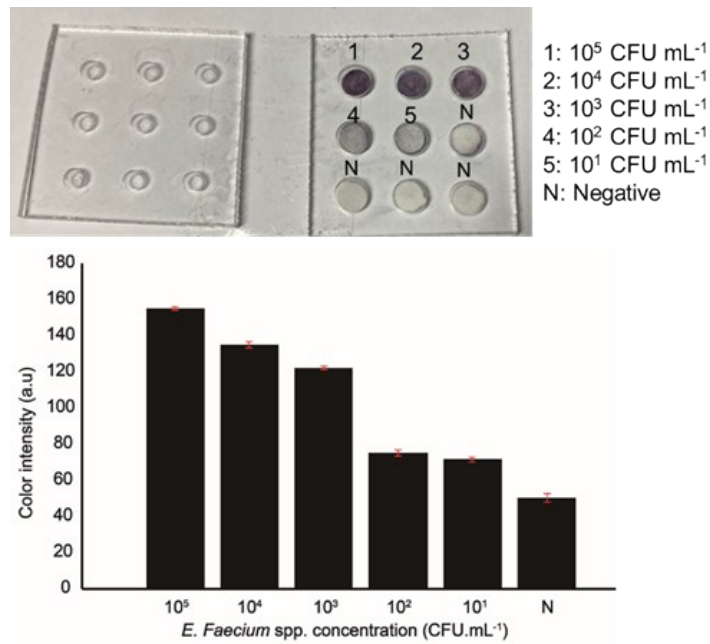

**Fig. S5** Results of 10-fold serial dilution of *E. faecium* spp. observed using a paper-based portable device.

**Table S1** Primers used for amplifying *Enterococcus faecium* spp (esp gene)

| Primers | Sequences (5'-3')                              |
|---------|------------------------------------------------|
| F3      | CCAGAACACTTATGGAACAG                           |
| B3      | GTTGGGCTTTGTGACCTG                             |
| FIP     | CGTGTCTCCGCTCTTCTTTTATTTGCAAGATATTGATGGTG      |
| BIP     | ATCGGGAAACCTGAATTAGAAGAAGAACTCGTGGATGAATACTTTC |
| LB      | TGATGTTGACACAACAGTTAAGGG                       |

**Table S2** Primers used for amplifying COVID-19 plasmid DNA

| Primers | Sequences (5'-3')                        |
|---------|------------------------------------------|
| F3      | GAAACCGGCACCCTGATC                       |
| B3      | GGAGCTGTTCAAGTTCTTCA                     |
| FIP     | TCAGGATAGCCAGGGTCACCACTGAACTCCGTGCTGCTGT |
| BIP     | CGCTCTGAGACTGTGCGCTTCGCGGCTGTACACGTAGA   |
| LF      | AGGAACACCACGAAGGCC                       |
| LB      | ACTGCTGCAACATCGTGAACa                    |
